# Supplementary material
Source: PubMed Central journal article supplement (PMC5378544)

**Frequency and variation of Choosing Wisely recommendations in primary care: a retrospective, population-based cohort study**

Ciara Pendrith, MSc;<sup>1</sup> Meghan Bhatia, BSc;<sup>2</sup> Noah M Ivers, MD, PhD;<sup>3,4</sup> Graham Mcreedy, MSc;<sup>5</sup> Karen Tu, MD, MSc;<sup>3,5</sup> Gillian A Hawker, MD, MSc;<sup>5,6</sup> Susan B Jaglal, PhD;<sup>5,7</sup> Lynn Wilson, MD;<sup>3,4</sup> Kimberly Wintemute, MD;<sup>8</sup> Richard H Glazier, MD, MPH;<sup>3,5</sup> Wendy Levinson, MD;<sup>6</sup> R Sacha Bhatia, MD, MBA<sup>1,6</sup>

1. Institute for Health System Solutions and Virtual Care, Women's College Hospital, Toronto, Ontario, Canada
2. Queen's University School of Medicine, Kingston, Ontario, Canada
3. Department of Family and Community Medicine, University of Toronto, Toronto, Ontario, Canada
4. Department of Family and Community Medicine, Women's College Hospital, Toronto, Ontario, Canada
5. Institute for Clinical Evaluative Sciences, Toronto, Ontario, Canada
6. Department of Medicine, University of Toronto, Toronto, Ontario, Canada
7. Department of Physical Therapy, University of Toronto, Toronto, Ontario, Canada
8. North York Family Health Team, North York General Hospital, Toronto, Ontario, Canada

**Corresponding author:** R Sacha Bhatia

Women's College Hospital  
76 Grenville Street, 6<sup>th</sup> Floor  
Toronto, Ontario, Canada, M5S 1B1  
Telephone: 1-416-323-7516  
Email: [sacha.bhatia@wchospital.ca](mailto:sacha.bhatia@wchospital.ca)

**Funding:** This study was supported by the Institute for Clinical Evaluative Sciences (ICES), which is funded in part by an annual grant from the Ontario Ministry of Health and Long-Term Care (MOHLTC). The funders had no role in the design and conduct of the study; the collection, management, analysis or interpretation of the data; the preparation, review or approval of the manuscript; or the decision to submit the manuscript for publication. The opinions, results and conclusions reported in this paper are those of the authors and are independent from the funding sources. No endorsement by ICES or the Ontario MOHLTC is intended or should be inferred. NMI is supported by New Investigator Awards from the Canadian Institutes of Health Research and the Department of Family and Community Medicine, University of Toronto.

**Competing interests:** All authors have completed the ICMJE uniform disclosure form at [www.icmje.org/coi\\_disclosure.pdf](http://www.icmje.org/coi_disclosure.pdf) and declare: no support from any organisation for the submitted work; no financial relationships with any organisations that might have an

1  
2  
3  
4  
5  
6  
7  
8  
9  
10  
11  
12  
13  
14  
15  
16  
17  
18  
19  
20  
21  
22  
23  
24  
25  
26  
27  
28  
29  
30  
31  
32  
33  
34  
35  
36  
37  
38  
39  
40  
41  
42  
43  
44  
45  
46  
47  
48  
49  
50  
51  
52  
53  
54  
55  
56  
57  
58  
59  
60

interest in the submitted work in the previous three years; no other relationships or activities that could appear to have influenced the submitted work.

**Key words:** choosing wisely, low value care, low back pain, cervical cancer screening, bone mineral density testing

**Word count (text excluding references, tables, figures, appendices):** 2471

**Abstract Word count:** 249

Confidential

1  
2  
3  
4 **Background:** This study's purpose was to explore utilization and variability of three  
5 Choosing Wisely recommendations related to primary care: (1) low back pain imaging  
6 with no red flags; (2) cervical cancer screening for women <21 or >69; and (3) dual  
7 energy X-ray absorptiometry (DEXA) scans repeated more often than every two years.

8  
9  
10 **Methods:** We conducted a population-based retrospective cohort study using  
11 administrative healthcare databases from Ontario to identify rates of the following low  
12 value services between fiscal years 2008 and 2012: CT and/or MRI imaging following a  
13 low back pain diagnosis, Pap testing in women <21 or >69, and repeated DEXA scanning  
14 within two years of index scan. Regional- and primary practice-level rates were  
15 calculated. Bivariate analyses were conducted to explore associations between patient  
16 factors and repeat DEXA scans.

17  
18  
19 **Results:** Repeated DEXA scans was the most prevalent service (21.0%), while cervical  
20 cancer screening among women <21 or >69 (8.0%) and CT and/or MRI imaging for low  
21 back pain (4.5%) were less frequent. There was substantial variation across practices with  
22 rates of repeated DEXA scans ranging from 4.0% to 54.9%, and cervical cancer  
23 screening from 0.9% to 35.2%. Patients with a high risk index DEXA were more likely to  
24 receive a repeat scan (28.1%) than those with a baseline (8.9%) or low risk (8.1%) scan.

25  
26  
27 **Interpretation:** There is significant, practice-level variation in the frequency of low  
28 value testing for DEXA scans, back imaging, and cervical cancer screening. There is a  
29 particular need for interventions aiming to reduce unnecessary DEXA testing.  
30  
31  
32  
33  
34  
35  
36  
37  
38  
39  
40  
41  
42  
43  
44  
45  
46  
47  
48  
49  
50  
51  
52  
53  
54  
55  
56  
57  
58  
59  
60

## INTRODUCTION

Low value care, defined as care where there is a lack of benefit, or where the benefits are outweighed by the potential risks, can lead to higher healthcare costs, patient inconvenience, and in some cases harm to patients [1, 2]. There is growing recognition that low value care is common in health systems around the world [3]. The Institute of Medicine estimates that up to 30% of medical care may be classified as low value care [1].

The Choosing Wisely® (CW) campaign is a grassroots effort to address the issue of low value care that launched in the United States in 2012 [4]. The CW campaign, which has been adopted by 18 countries, aims to change practice by harnessing physician leadership, increasing awareness regarding low value tests, procedures, and treatments, and by emphasizing the inherent risks to patients [3]. The CW campaign launched in Canada in 2014, with eight specialty societies releasing “Top Five” lists of common clinical practices that are considered low value care [5]. One of the original specialties to participate was the College of Family Physicians of Canada (CFPC), which now endorses eleven evidence based CW recommendations [6].

As countries around the world implement CW campaigns, there is a need to assess which low value services are frequently performed in clinical practice [7], particularly in primary care where patients most often receive care. To maximize the likelihood of impact, interventions developed to address low value care should focus on topics where there is substantial room for improvement. A previously published framework for selecting target areas for improvement suggests using administrative data to identify frequently performed services with a high degree of inappropriate variation as a signal

1  
2  
3 point to investigate deeper into the factors driving overutilization [7]. We selected three  
4  
5 CW recommendations relevant to primary care for investigation: (1) imaging for low  
6  
7 back pain in the absence of red flags [6, 8, 9]; (2) cervical cancer screening for women  
8  
9 <21 or >69 years of age [6, 8, 10]; and (3) repeat dual X-ray absorptiometry (DEXA)  
10  
11 scans more often than every two years [11, 12]. These recommendations were chosen  
12  
13 because we believed them to be frequently ordered in primary care, and accurately  
14  
15 measurable from administrative data using previously published search algorithms [13-  
16  
17  
18  
19  
20  
21  
22  
23  
24  
25  
26  
27  
28  
29  
30  
31  
32  
33  
34  
35  
36  
37  
38  
39  
40  
41  
42  
43  
44  
45  
46  
47  
48  
49  
50  
51  
52  
53  
54  
55  
56  
57  
58  
59  
60

The objectives of this study are to conduct exploratory analyses to understand how frequently selected CW recommendations are ordered, assess the degree of variation in ordering that exists across regions and practices, identify services that may warrant further investigation and targeted interventions [7].

## METHODS

### Study Design and Data Sources

We conducted a retrospective cohort study in Ontario, Canada, using linked population-based administrative health care databases held at the Institute for Clinical Evaluative Sciences (ICES). The datasets were linked using unique encoded identifiers and analyzed at ICES. The Registered Persons Database (RPDB) contains demographic information on all Ontario residents eligible for the Ontario Health Insurance Plan (OHIP). The OHIP claims database contains all billing claims made by Ontario physicians. The Client Agency Program Enrolment (CAPE) tables were used to identify patients rostered to primary care physicians.

## Cohort Selection

The study cohort was selected from Ontario patients with a valid provincial OHIP number meeting eligibility criteria for one or more study recommendation between April 1, 2008 and March 31, 2013. Drawing from indicator definitions in the literature [13-17], we developed algorithms using physician claims and hospital encounter data to identify the cohorts for each study recommendation. **Table 1** describes the inclusion and exclusion criteria, follow up period, and outcome definitions for each measure (**Appendix 1** contains full cohort definitions). In brief, we selected patients meeting eligibility criteria for one or more cohort: 1) adults with a low back pain diagnosis from a family physician without red flags using methods developed by ICES [13]; 2) women <21 or >69 with no prior gynaecological cancer diagnoses or hysterectomy using a validated algorithm to identify women screened for cervical cancer in Ontario[15]; or 3) adults  $\geq 40$  and older receiving a DEXA scan using billing claims previously described by Jaglal and colleagues and previously validated [14, 18].

## Covariates

We collected patient age, sex, rurality and neighbourhood income quintile. For patients in the repeat DEXA scan cohort, we also collected information on the index scan type from the fee schedule. A patient's first ever DEXA is a 'baseline scan.' Afterwards, patients are classified by risk where patients with osteoporosis, osteopenia, or considered being high risk for accelerated bone loss on a previous DEXA receive 'high risk scans' and the remaining patients receive 'low risk scans.' There are no differences in the amount payable across risk levels. We determined whether patients had a regular family physician using enrolment status in the CAPE tables, or a validated billing algorithm.

1  
2  
3 Practices were defined as billing groups: three or more primary care physicians who  
4 submit joint billings to OHIP for reimbursement. We excluded practices with less than  
5 three physicians for privacy reasons and those with missing demographic variables.  
6  
7  
8 Practices with fewer than 30 patients meeting recommendation eligibility were excluded  
9 from analyses for that measure to avoid practices with small numbers of cases unduly  
10 influencing the practice analyses.  
11  
12  
13  
14  
15  
16

### 17 **Outcomes**

18  
19 Our primary outcome was receipt of a potentially low value test assessed using  
20 OHIP claims, as outlined by the CW recommendations and described in **Table 1**.  
21  
22  
23

### 24 **Statistical Analyses**

25  
26 We calculated events rates for each measure for all of Ontario, as well as at the  
27 regional- and practice-levels. Poisson regression was used to investigate temporal trends  
28 among each recommendation and when overdispersion was detected, a negative binomial  
29 distribution was used instead to obtain more precision estimates of standard error.  
30  
31  
32  
33

34 Regional variation was assessed using the coefficient of variation (CV) across Ontario's  
35 14 Local Health Integration Networks (LHIN) – geographically organized administrative  
36 regions that plan, integrate, and fund local health care. We assessed variation in ordering  
37 across primary care practices by comparing unadjusted event rates for each measure and  
38 calculating the CV. We considered recommendations warranting further investigation to  
39 be those with substantial room for improvement, defined as having a utilization rate  
40  $\geq 15\%$  which would better lend itself to quality improvement initiatives designed to  
41 reduce frequency of these low value tests. Recommendations meeting these criteria were  
42 explored by identifying potential patient level predictors of testing using two sample t-  
43  
44  
45  
46  
47  
48  
49  
50  
51  
52  
53  
54  
55  
56  
57  
58  
59  
60

1  
2  
3 tests and Chi-square tests, where appropriate. All statistical analyses were performed  
4  
5 using SAS version 9.4 (SAS Institute, Cary, NC).  
6  
7

## 8 **RESULTS**

### 9 **Cohort**

10  
11  
12  
13  
14  
15 Between 2008/09 and 2012/13 we selected a unique cohort of patients meeting  
16  
17 eligibility criteria for each CW recommendation: 271,588 patients with low back pain,  
18  
19 2,229,113 patients with an index DEXA scan, and 7,417,444 women aged <21 or >69  
20  
21 (**Appendix 2** contains diagrams for each cohort and **Appendix 3** describes patient  
22  
23 characteristics for each cohort in 2012/2013).  
24  
25

### 26 **Provincial Frequency of CW Recommendations**

27  
28  
29 The most prevalent potentially low value service was repeated DEXA scans,  
30  
31 where 21.0% of patients with an index scan received a second scan within two years.  
32  
33 Overall, 8.0% of women in the cervical cancer screening population received at least one  
34  
35 low value Pap test, with significantly higher screening rates for women <21 than those  
36  
37 >69 (10.8% vs. 5.0%;  $p < 0.001$ ). Imaging for low back pain was the least prevalent  
38  
39 service with 4.5% of patients receiving a CT and/or MRI within three months of initial  
40  
41 diagnosis. Over the study period, the rates of cervical cancer screening decreased  
42  
43 significantly ( $p = 0.002$ ) while there was no significant trend in rates of imaging for low  
44  
45 back pain ( $p = 0.071$ ) or repeat DEXA scans ( $p = 0.17$ ). (**Figure 1**).  
46  
47  
48  
49

### 50 **Variability**

51  
52  
53 Substantial variation in the frequency of utilization rates was observed across  
54  
55 LHINs (**Appendix 4**). At the regional level, the highest degree of variation observed was  
56  
57  
58  
59  
60



1  
2  
3 for low back pain imaging (CV = 0.35), which ranged from 2.5% to 8.3% across LHINs.  
4  
5 The rate of repeat DEXA scans ranged from 13.8% to 28.2% (CV = 0.24). The lowest  
6  
7 degree of variation was observed for cervical cancer screening (CV = 0.14), which ranged  
8  
9 from 6.6% to 10.4%.  
10  
11

12 **Figure 2** displays the degree of practice-level variation in the use of low value  
13 testing. Variation was highest for imaging for low back pain (range 0.8-32.6%; CV =  
14 0.59), followed by repeat DEXA scans (range 4.0-54.9%; CV = 0.39), and cervical cancer  
15 screening (range 0.9-35.2%; CV = 0.36).  
16  
17  
18  
19  
20  
21

### 22 **Potential Predictors of Low Value Testing**

23  
24 Repeat DEXA scans was the only potential low value test with substantial room  
25 for improvement, and as such, was the only low value test that warranted further  
26 investigation into the potential drivers of overutilization. Patients receiving a repeat scan  
27 were significantly older ( $p < 0.001$ ), and women were more likely to receive a repeat scan  
28 than men ( $p < 0.001$ ; **Table 2**). Living in urban or higher income areas was associated  
29 with increased testing rates. There were significant differences in utilization rates across  
30 index scan risk level: patients who had a high risk index scan had a much higher repeat  
31 testing rate (28.1%) than patients who had a baseline (8.7%) or low risk (8.1%) scan.  
32  
33  
34  
35  
36  
37  
38  
39  
40  
41  
42

### 43 **INTERPRETATION**

44  
45 The results from this large, retrospective cohort study demonstrate that some low  
46 value tests are more frequent than others with utilization rates ranging from 4.5% for low  
47 back pain imaging to 21.0% for DEXA testing. We found substantial variability in  
48 utilization rates regardless of the frequency of ordering overall, including a 14-fold  
49 difference in DEXA ordering and a 40-fold difference in low back pain imaging across  
50  
51  
52  
53  
54  
55  
56  
57  
58  
59  
60

1  
2  
3 practices. Our findings suggest some potential predictors of ordering low value DEXA  
4 scans, including female sex, higher neighbourhood income quintile, and the risk level of  
5 the index scan.  
6  
7  
8

9  
10 While the focus of quality improvement initiatives has predominantly been on  
11 misuse and underuse [1], there is emerging research on overuse that offers comparisons  
12 for our findings. Among U.S. Medicare beneficiaries  $\geq 65$ , similar frequencies of low  
13 back pain imaging (4.1-9.4%) and use of cervical cancer screening (6.4-6.9%) have been  
14 reported, though rates of repeat DEXA scans among patients with osteoporosis were  
15 lower than in our study (0.8-1.0%) [17]. However a recent study that examined temporal  
16 ordering trends of CW recommendations in a large US commercial health plan found  
17 substantially higher rates of low back pain imaging without red flags (53.7%) [19]. This  
18 large discrepancy is likely related to varying definitions of low value care, but may also  
19 be influenced by differences in testing practices and populations. While prior analyses  
20 have examined population-level data and regional variation, few studies have assessed  
21 utilization rates at the primary care practice level and variability in ordering across  
22 practices. Furthermore, our study includes an entire population from a single payer,  
23 publicly funded system with no patient co-payments, which is novel as most prior  
24 research on overuse has been done in the United States [16, 17, 19].  
25  
26  
27  
28  
29  
30  
31  
32  
33  
34  
35  
36  
37  
38  
39  
40  
41  
42  
43  
44  
45

46 Our study has several limitations. First, administrative databases do not provide  
47 important clinical information, such as presence of symptoms or abnormal physical exam  
48 findings that are necessary to determine appropriateness [27]. For example, clinical  
49 information not captured may identify patients with an accelerated expected rate of bone  
50 loss where repeat scans may be appropriate. Second, our rate of imaging for low back  
51  
52  
53  
54  
55  
56  
57  
58  
59  
60

1  
2  
3 pain may be underestimated. Since administrative data lacks clinical nuance, we  
4  
5 developed an exhaustive list of red flag exclusions for this cohort to avoid capturing false  
6  
7 positives; however, excluding higher risk patients may have biased our sample. Prior  
8  
9 literature has shown that the rate of low back pain scans for red flag conditions is a small  
10  
11 minority of overall ordering [28]. Third, we were unable to measure individual physician  
12  
13 ordering behaviour within a practice, and thus are unable to assess the extent to which an  
14  
15 individual physician may skew the results of the practice. Fourth, we cannot determine  
16  
17 whether the ordering physician for the test was the primary care doctor, or a subspecialist,  
18  
19 though prior research has demonstrated that the majority of ordering is by family  
20  
21 physician [29]. Fifth, we were unable to account for factors that may account for  
22  
23 differences in ordering across practices, including decision support tools associated with  
24  
25 an electronic medical record [30]. Finally, as we conducted exploratory analyses into  
26  
27 potential predictors, we were unable to assess the adjusted association of patient,  
28  
29 provider, and practice characteristics with low value DEXA testing. Provider-level  
30  
31 factors, including years since graduation or practice setting, would be valuable in  
32  
33 identifying potential intervention targets. However, our findings identify potential  
34  
35 predictors that future research may build upon.  
36  
37  
38  
39  
40  
41  
42  
43  
44

45 The results of our study have significant importance for public policy. The  
46  
47 dramatic variation in ordering across practices in a large jurisdiction like Ontario suggests  
48  
49 more work is needed to understand the drivers of low value care at the patient, practice,  
50  
51 and provider levels. The lower rates of cervical screening and low back pain imaging  
52  
53 compared to repeat DEXA may reflect increased penetrance of guideline  
54  
55 recommendations and policy changes. The Ontario government amended the fee schedule  
56  
57  
58  
59  
60

1  
2  
3 to align with the guideline changes made in 2012 [20]: effective January 2013, cervical  
4 cancer screening was not insured to women <21 or >70 years of age [21]. Imaging for  
5  
6 low back pain has been the subject of significant quality improvement efforts funded in  
7  
8 part by the provincial government [22]. While it's too early to assess the longer term  
9  
10 impact of these policy changes on ordering patterns, the likelihood of further  
11  
12 improvements in population rates for cervical screening and low back pain imaging  
13  
14 seems low. To address low value testing that is relatively uncommon at the population  
15  
16 level but with high variation, targeted feedback to high ordering practices [22] that  
17  
18 incorporates social norms may be a promising approach. In contrast, funding changes or  
19  
20 other policy levers may be appropriate to address low value tests that are commonly used  
21  
22 across a population. For example, provisions in the Ontario fee schedule allowing annual  
23  
24 DEXA scans among high risk patients may drive higher testing rates. This would be  
25  
26 supported by Canadian Rheumatology Association and Canadian Association of Nuclear  
27  
28 Medicine guidelines, which recommend against repeating scans within two years as it is  
29  
30 likely that more time is needed to reliably measure bone mineral density change [6, 8-12,  
31  
32 23, 24]. However, strategies to reduce overuse of low value services should consider  
33  
34 unintended consequences and be balanced with efforts to prevent concurrent underuse of  
35  
36 high value services [25][24] as previous limits to scanning for "low risk" patients in  
37  
38 Ontario led to reductions in use for both "low" and "high risk" patients [14]. Strategies to  
39  
40 reduce overuse should be communicated carefully to avoid negatively impacting  
41  
42 appropriate use, confusion, and undermining trust in the medical system [26].  
43  
44  
45  
46  
47  
48  
49  
50  
51

## 52 CONCLUSIONS

53  
54  
55  
56  
57  
58  
59  
60

1  
2  
3 In this large, population-based retrospective study of low value services in  
4 primary care, we found significant regional and practice variation of all three services.  
5  
6 While rates of cervical screening and imaging for low back pain were lower than  
7  
8 expected, significant practice variation was observed, and low value DEXA scans were  
9  
10 frequent. The results suggest opportunities for further reducing low value care in primary  
11  
12 care.  
13  
14  
15  
16  
17  
18  
19  
20  
21  
22  
23  
24  
25  
26  
27  
28  
29  
30  
31  
32  
33  
34  
35  
36  
37  
38  
39  
40  
41  
42  
43  
44  
45  
46  
47  
48  
49  
50  
51  
52  
53  
54  
55  
56  
57  
58  
59  
60

Confidential

1  
2  
3  
4  
5  
6  
7  
8  
9  
10  
11  
12  
13  
14  
15  
16  
17  
18  
19  
20  
21  
22  
23  
24  
25  
26  
27  
28  
29  
30  
31  
32  
33  
34  
35  
36  
37  
38  
39  
40  
41  
42  
43  
44  
45  
46  
47  
48  
49  
50  
51  
52  
53  
54  
55  
56  
57  
58  
59  
60

## Tables

**Table 1: Cohort selection criteria**

| Description                                                                                                                                                                                                                                                    | Denominator                                                                                                                                                                                                                                                                                                                                                                                              | Numerator                                                                                                                              |
|----------------------------------------------------------------------------------------------------------------------------------------------------------------------------------------------------------------------------------------------------------------|----------------------------------------------------------------------------------------------------------------------------------------------------------------------------------------------------------------------------------------------------------------------------------------------------------------------------------------------------------------------------------------------------------|----------------------------------------------------------------------------------------------------------------------------------------|
| Imaging for low back pain                                                                                                                                                                                                                                      |                                                                                                                                                                                                                                                                                                                                                                                                          |                                                                                                                                        |
| Don't do imaging for lower-back pain unless red flags are present (CFPC; CAR; CSS).                                                                                                                                                                            | Inclusion criteria: claim for visit to primary care physician with low back pain diagnosis with first visit as index date. Exclusions: age <18 or >105; red flag medical history up to 5 years prior: previous low back pain diagnoses, certain diagnoses (e.g. neoplasms, neurological diagnoses, fractures), visits to neurosurgeons or orthopaedic surgeons, prior spine-related scans or operations. | Individuals meeting inclusion and exclusion criteria with at least one claim for spine CT and/or MRI up to 3 months after index event. |
| Repeat DEXA scans                                                                                                                                                                                                                                              |                                                                                                                                                                                                                                                                                                                                                                                                          |                                                                                                                                        |
| Don't repeat dual X-ray absorptiometry (DEXA) scans more often than every two years (CRA; CANM).                                                                                                                                                               | Inclusion criteria: claim for baseline or subsequent DEXA scan with claim date as index date. Exclusions: age <40 or >105.                                                                                                                                                                                                                                                                               | Individuals meeting inclusion and exclusion criteria with at least one claim for repeat DEXA scan within two years of index date.      |
| Cervical cancer screening                                                                                                                                                                                                                                      |                                                                                                                                                                                                                                                                                                                                                                                                          |                                                                                                                                        |
| Don't screen women with Pap smears if under 21 years of age or over 69 years of age (CFPC; CAP).                                                                                                                                                               | Inclusion criteria: females aged <21 or >69 years of age. Exclusions: age <13 or >105; previous gynecologic cancer diagnoses; previous hysterectomy; pregnancy; HIV infection.                                                                                                                                                                                                                           | Individuals meeting inclusion and exclusion criteria with at least one claim for cervical cancer screening Pap smear.                  |
| CFPC = College of Family Physicians of Canada; CAR = Canadian Association of Radiologists; CSS = Canadian Spine Society; CRA = Canadian Rheumatology Association; CANM = Canadian Association of Nuclear Medicine; CAP = Canadian Association of Pathologists. |                                                                                                                                                                                                                                                                                                                                                                                                          |                                                                                                                                        |

**Table 2: Bivariate associations between patient characteristics and having a repeat DEXA scan within 2 years of a previous scan**

| Characteristic, n (%)*        | Received repeat DEXA | Did not receive repeat DEXA | p-value |
|-------------------------------|----------------------|-----------------------------|---------|
| N                             | 86,213               | 308,181                     |         |
| Age, mean (95% CI)            | 65.2 (65.1-65.3)     | 63.6 (63.5-65.6)            | <0.001  |
| Gender                        |                      |                             | <0.001  |
| Female                        | 75,582 (22.8)        | 256,616 (77.2)              |         |
| Male                          | 10,631 (17.1)        | 51,485 (82.9)               |         |
| Neighbourhood income quintile |                      |                             | <0.001  |
| 1 (lowest)                    | 13,151 (20.4)        | 51,304 (79.6)               |         |
| 2                             | 15,774 (21.2)        | 58,494 (78.8)               |         |
| 3                             | 16,453 (21.3)        | 60,681 (78.7)               |         |
| 4                             | 19,054 (22.4)        | 65,832 (77.6)               |         |
| 5 (highest)                   | 21,516 (23.4)        | 70,464 (76.6)               |         |
| Rurality                      |                      |                             | <0.001  |
| Urban                         | 79,983 (22.5)        | 274,745 (77.5)              |         |
| Rural                         | 6,144 (15.7)         | 32,867 (84.3)               |         |
| Index scan risk level         |                      |                             | <0.001  |
| Baseline scan                 | 6,596 (8.7)          | 68,860 (91.3)               |         |
| Low risk scan                 | 4,030 (8.1)          | 45,540 (91.9)               |         |
| High risk scan                | 75,587 (28.1)        | 193,711 (71.9)              |         |

1  
2  
3  
4  
5  
6  
7  
8  
9  
10  
11  
12  
13  
14  
15  
16  
17  
18  
19  
20  
21  
22  
23  
24  
25  
26  
27  
28  
29  
30  
31  
32  
33  
34  
35  
36  
37  
38  
39  
40  
41  
42  
43  
44  
45  
46  
47  
48  
49  
50  
51  
52  
53  
54  
55  
56  
57  
58  
59  
60

**Figure legends**

**Figure 1: Utilization rates of low value services across study period**

**Figure 2: Practice-level variation in utilization rates of low value services. Each dot represents the utilization rate at an individual primary care practice and the dashed line represents the mean utilization rate across all practices.**

Confidential



1  
2  
3 **Contributors:** CP and RSB were responsible for study concept and design. CP, GM and  
4 RSB acquired the data. CP and GM did the statistical analyses. All authors analysed and  
5 interpreted the data. CP, MB and RSB drafted the manuscript. All authors critically  
6 revised the manuscript for important intellectual content and approved the final version to  
7 be published. RSB obtained funding. WL and RSB supervised the study. All authors had  
8 full access to all of the data. RSB is the guarantor.

9  
10  
11 **Acknowledgements:** Parts of this material are based on data and information compiled  
12 and provided by the Canadian Institute for Health Information (CIHI). However, the  
13 analyses, conclusions, opinions and statements expressed herein are those of the author,  
14 and not necessarily those of CIHI. Parts of this material are based on data and  
15 information provided by Cancer Care Ontario (CCO). The opinions, results, view, and  
16 conclusions reported in this paper are those of the authors and do not necessarily reflect  
17 those of CCO. No endorsement by CCO is intended or should be inferred.

18  
19  
20 **Ethical approval:** Research ethics approval was received from Sunnybrook Health  
21 Sciences Centre, Toronto, Ontario, Canada.

22  
23  
24 **Transparency statement:** The lead author, guarantor of the manuscript, affirms that this  
25 manuscript is an honest, accurate, and transparent account of the study being reported;  
26 that no important aspects of the study have been omitted; and that any discrepancies from  
27 the study as planned (and, if relevant, registered) have been explained.

28  
29  
30 **Data sharing:** no additional data available

31  
32  
33  
34 **Copyright/licence for publication:** The Corresponding Author has the right to grant on  
35 behalf of all authors and does grant on behalf of all authors, a worldwide licence to the  
36 Publishers and its licensees in perpetuity, in all forms, formats and media (whether  
37  
38  
39  
40  
41  
42  
43  
44  
45  
46  
47  
48  
49  
50  
51  
52  
53  
54  
55  
56  
57  
58  
59  
60

1  
2  
3 known now or created in the future), to i) publish, reproduce, distribute, display and store  
4 the Contribution, ii) translate the Contribution into other languages, create adaptations,  
5 reprints, include within collections and create summaries, extracts and/or, abstracts of the  
6 Contribution, iii) create any other derivative work(s) based on the Contribution, iv) to  
7 exploit all subsidiary rights in the Contribution, v) the inclusion of electronic links from  
8 the Contribution to third party material where-ever it may be located; and, vi) licence any  
9 third party to do any or all of the above.  
10  
11  
12  
13  
14  
15  
16  
17  
18  
19  
20  
21  
22  
23  
24  
25  
26  
27  
28  
29  
30  
31  
32  
33  
34  
35  
36  
37  
38  
39  
40  
41  
42  
43  
44  
45  
46  
47  
48  
49  
50  
51  
52  
53  
54  
55  
56  
57  
58  
59  
60

Confidential

## References

1. Institute of Medicine, in *Crossing the Quality Chasm: A New Health System for the 21st Century*. 2001, National Academy Press: Washington (DC).
2. Wennberg, J.E., E.S. Fisher, and J.S. Skinner, *Geography and the debate over Medicare reform*. Health Aff (Millwood), 2002. **Suppl Web Exclusives**: p. W96-114.
3. Levinson, W., et al., '*Choosing Wisely*': a growing international campaign. BMJ Qual Saf, 2015. **24**(2): p. 167-174.
4. Wolfson, D., J. Santa, and L. Slass, *Engaging physicians and consumers in conversations about treatment overuse and waste: a short history of the choosing wisely campaign*. Acad Med, 2014. **89**(7): p. 990-5.
5. Levinson, W. and T. Huynh, *Engaging physicians and patients in conversations about unnecessary tests and procedures: Choosing Wisely Canada*. Cmaj, 2014. **186**(5): p. 325-6.
6. College of Family Physicians of Canada and Canadian Medical Association Forum on General and Family Practice Issues. *Eleven Things Physicians and Patients Should Question*. 2014 [cited 2015 February 6]; Available from: <http://www.choosingwiselycanada.org/recommendations/family-medicine/>.
7. Bhatia, R.S., et al., *Measuring the effect of Choosing Wisely: an integrated framework to assess campaign impact on low-value care*. BMJ Qual Saf, 2015. **24**(8): p. 523-31.
8. American Academy of Family Physicians. *Fifteen Things Physicians and Patients Should Question*. 2013 [cited 2015 November 23]; Available from: <http://www.choosingwisely.org/societies/american-academy-of-family-physicians/>.
9. Canadian Association of Radiologists. *Five Things Physicians and Patients Should Question*. 2014 [cited 2015 February 6]; Available from: <http://www.choosingwiselycanada.org/recommendations/radiology/>.
10. Canadian Association of Pathologists. *Five Things Physicians and Patients Should Question*. 2014 [cited 2015 February 6]; Available from: <http://www.choosingwiselycanada.org/recommendations/pathology/>.
11. American College of Rheumatology. *Five Things Physicians and Patients Should Question*. 2013 [cited 2015 November 23]; Available from: <http://www.choosingwisely.org/societies/american-college-of-rheumatology/>.
12. Chow, S.L., et al., *Choosing Wisely: The Canadian Rheumatology Association's List of 5 Items Physicians and Patients Should Question*. J Rheumatol, 2015.
13. Iron, K., et al., *Investigation of acute lower back pain in Ontario: Are guidelines being followed?*, ICES, Editor. 2004: Toronto, Ontario.
14. Jaglal, S., et al., *Impact of a change in physician reimbursement on bone mineral density testing in Ontario, Canada: a population-based study*. CMAJ Open, 2014. **2**(2): p. E45-50.

15. Lofters, A.K., et al., *Low rates of cervical cancer screening among urban immigrants: a population-based study in Ontario, Canada*. *Med Care*, 2010. **48**(7): p. 611-8.
16. Colla, C.H., et al., *Choosing Wisely: Prevalence and Correlates of Low-Value Health Care Services in the United States*. *J Gen Intern Med*, 2014.
17. Schwartz, A.L., et al., *Measuring low-value care in Medicare*. *JAMA Intern Med*, 2014. **174**(7): p. 1067-76.
18. Allin, S., et al. *Capture of Osteoporosis and Fracture Information in an Electronic Medical Record Database from Primary Care*. in *AMIA Annual Symposium Proceedings*. 2014. American Medical Informatics Association.
19. Rosenberg, A., et al., *Early Trends Among Seven Recommendations From the Choosing Wisely Campaign*. *JAMA Intern Med*, 2015: p. 1-9.
20. Murphy, J., et al., *Cervical screening: a guideline for clinical practice in Ontario*. *J Obstet Gynaecol Can*, 2012. **34**(5): p. 453-8.
21. Ontario Ministry of Health and Long-Term Care. *Implementation of 2012 Physicians Services Agreement - Amendments to the Schedule of Benefits for Physician Service - Effective January 1, 2013*. INFOBulletin 2013 [cited 2015 November 23]; Available from: <http://www.health.gov.on.ca/en/pro/programs/ohip/bulletins/4000/bul4585.pdf>.
22. Ontario Ministry of Health and Long-Term Care. *Provincial Strategy for X-ray Computed Tomography (CT) and/or Magnetic Resonance Imaging (MRI) for Low Back Pain*. INFOBulletin 2012 [cited 2015 November 23]; Available from: <http://www.health.gov.on.ca/en/pro/programs/ohip/bulletins/4000/bul4569.pdf>.
23. Papaioannou, A., et al., *2010 clinical practice guidelines for the diagnosis and management of osteoporosis in Canada: summary*. *Cmaj*, 2010. **182**(17): p. 1864-73.
24. Canadian Association of General Surgery. *Six Things Physicians and Patients Should Question*. 2014 [cited 2015 7 Jan]; Available from: <http://www.choosingwiselycanada.org/recommendations/canadian-association-of-general-surgeons-3/>.
25. Kiran, T., et al., *The relationship between financial incentives and quality of diabetes care in Ontario, Canada*. *Diabetes Care*, 2012. **35**(5): p. 1038-46.
26. McCaffery, K.J., et al., *Walking the tightrope: communicating overdiagnosis in modern healthcare*. *BMJ*, 2016. **352**: p. i348.
27. Hawker, G.A., et al., *Determining the need for hip and knee arthroplasty: the role of clinical severity and patients' preferences*. *Med Care*, 2001. **39**(3): p. 206-16.
28. Gidwani, R., et al., *Inappropriate ordering of lumbar spine magnetic resonance imaging: are providers choosing wisely?* *Am J Manag Care*, 2016. **22**(2): p. e68-e76.
29. Jaglal, S.B., et al., *Patterns of use of the bone mineral density test in Ontario, 1992-1998*. *Canadian Medical Association Journal*, 2000. **163**(9): p. 1139-1143.

- 1  
2  
3  
4  
5  
6  
7  
8  
9  
10  
11  
12  
13  
14  
15  
16  
17  
18  
19  
20  
21  
22  
23  
24  
25  
26  
27  
28  
29  
30  
31  
32  
33  
34  
35  
36  
37  
38  
39  
40  
41  
42  
43  
44  
45  
46  
47  
48  
49  
50  
51  
52  
53  
54  
55  
56  
57  
58  
59  
60
30. Kaushal, R., K.G. Shojania, and D.W. Bates, *Effects of computerized physician order entry and clinical decision support systems on medication safety: a systematic review*. Arch Intern Med, 2003. **163**(12): p. 1409-16.

Confidential

1  
2  
3  
4  
5  
6  
7  
8  
9  
10  
11  
12  
13  
14  
15  
16  
17  
18  
19  
20  
21  
22  
23  
24  
25  
26  
27  
28  
29  
30  
31  
32  
33  
34  
35  
36  
37  
38  
39  
40  
41  
42  
43  
44  
45  
46  
47  
48  
49  
50  
51  
52  
53  
54  
55  
56  
57  
58  
59  
60

**Fiscal year Imaging for low back pain Cervical cancer screening Repeat DEXA scans**

| Fiscal year | Imaging for low back pain | Cervical cancer screening | Repeat DEXA scans |
|-------------|---------------------------|---------------------------|-------------------|
| 2008/09     | 5%                        | 9%                        | 21%               |
| 2009/10     | 5%                        | 9%                        | 21%               |
| 2010/11     | 5%                        | 9%                        | 21%               |
| 2011/12     | 5%                        | 8%                        | 21%               |
| 2012/13     | 4%                        | 5%                        | 22%               |

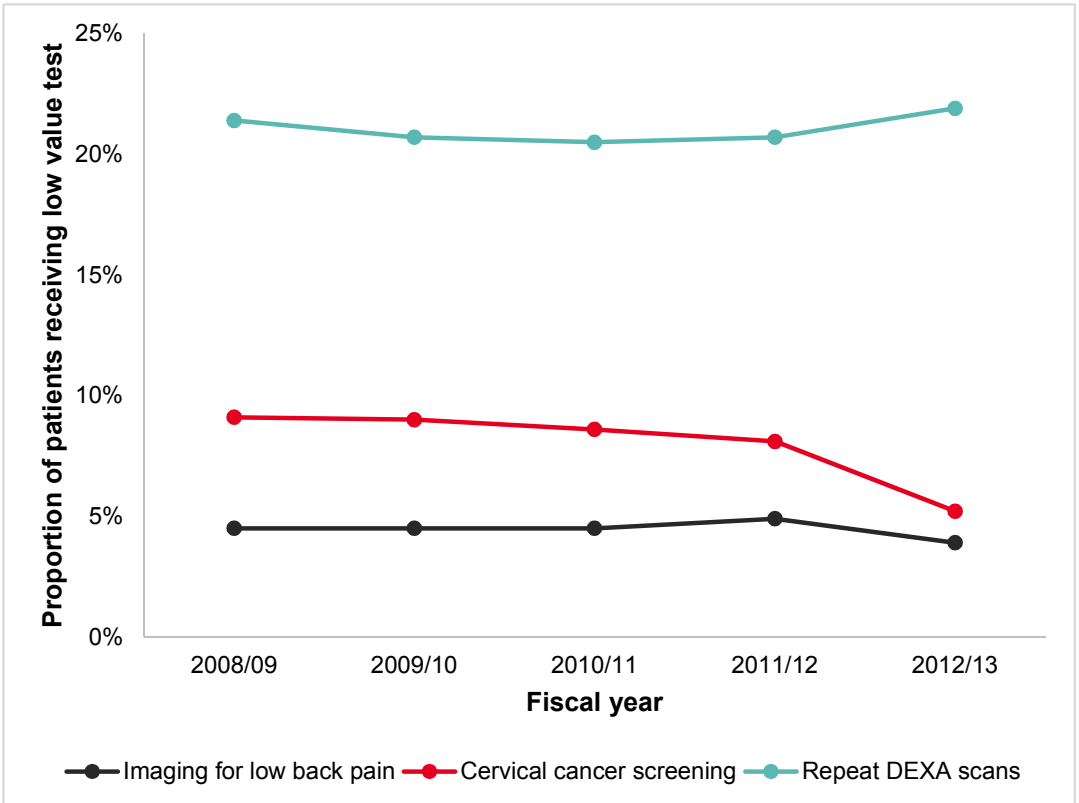

**Fiscal year Baseline scan Low risk scan High risk scan**

|      |       |      |       |
|------|-------|------|-------|
| 2008 | 10.4% | 9.8% | 29.0% |
| 2009 | 9.2%  | 9.0% | 28.3% |
| 2010 | 8.5%  | 8.4% | 27.4% |
| 2011 | 7.8%  | 7.9% | 27.0% |
| 2012 | 8.7%  | 8.1% | 28.1% |

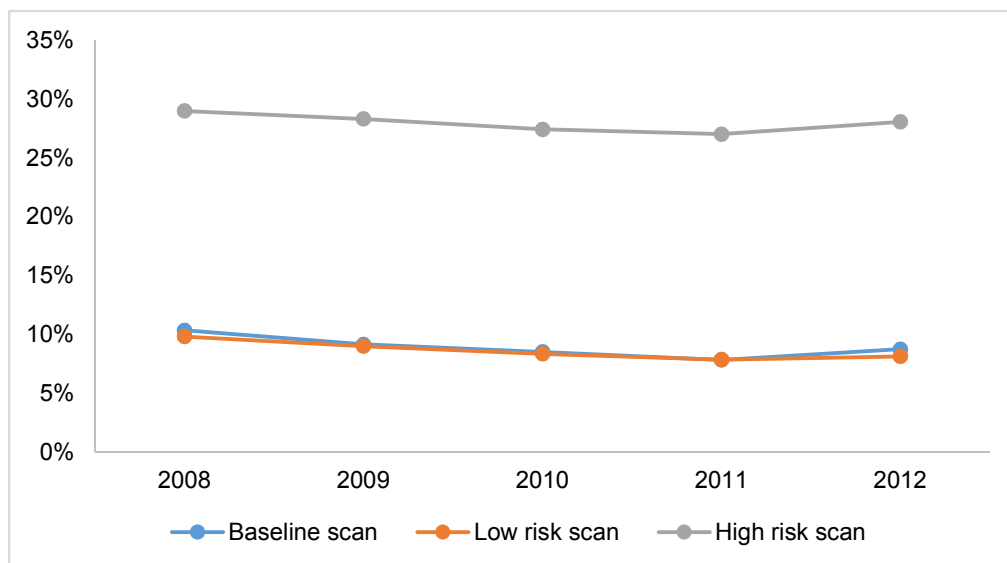

1  
2  
3  
4  
5  
6  
7  
8  
9  
10  
11  
12  
13  
14  
15  
16  
17  
18  
19  
20  
21  
22  
23  
24  
25  
26  
27  
28  
29  
30  
31  
32  
33  
34  
35  
36  
37  
38  
39  
40  
41  
42  
43  
44  
45  
46  
47  
48  
49  
50  
51  
52  
53  
54  
55  
56  
57  
58  
59  
60

**Baseline s Low risk s High risk scan**  
Overall 8.9% 28.0% 8.9%

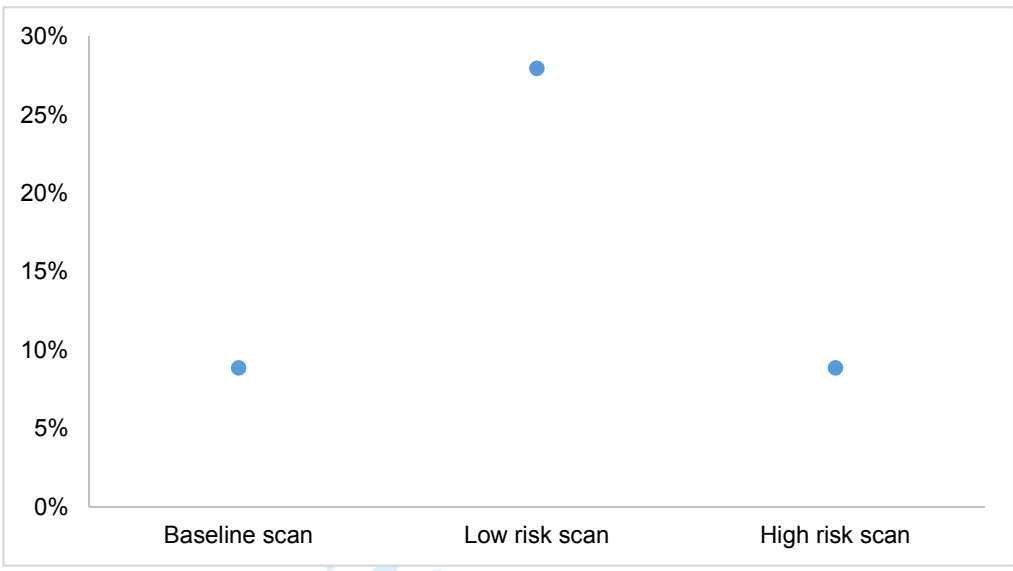

Confidential



1  
2  
3  
4  
5  
6  
7  
8  
9  
10  
11  
12  
13  
14  
15  
16  
17  
18  
19  
20  
21  
22  
23  
24  
25  
26  
27  
28  
29  
30  
31  
32  
33  
34  
35  
36  
37  
38  
39  
40  
41  
42  
43  
44  
45  
46  
47  
48  
49  
50  
51  
52  
53  
54  
55  
56  
57  
58  
59  
60

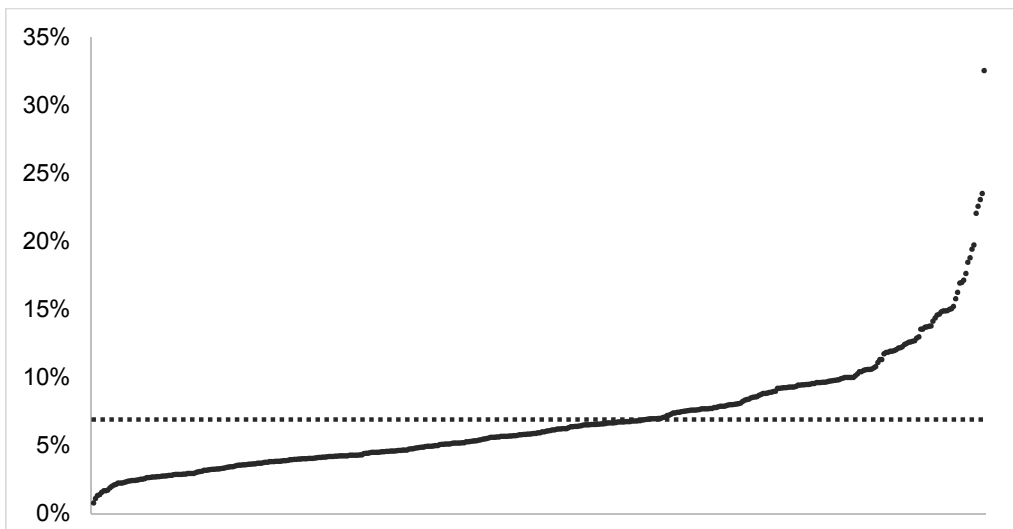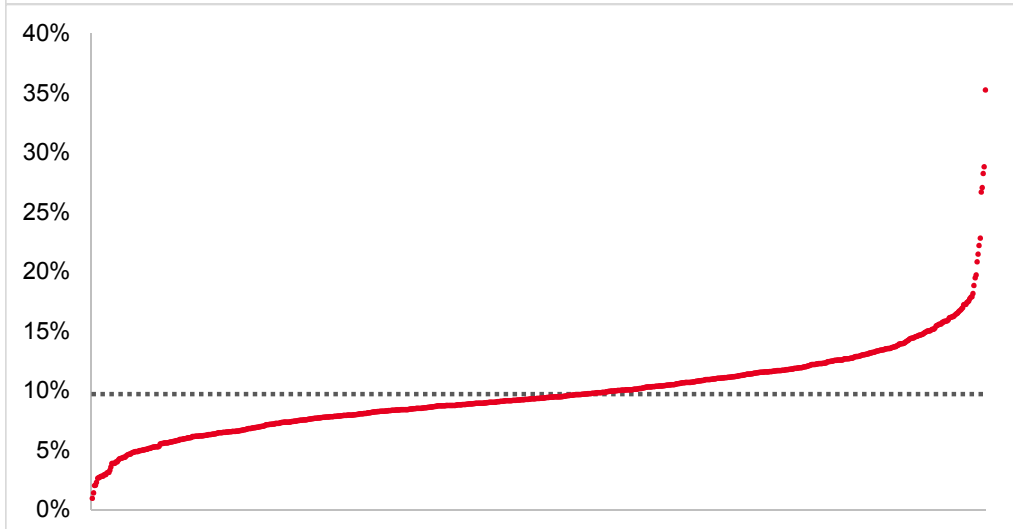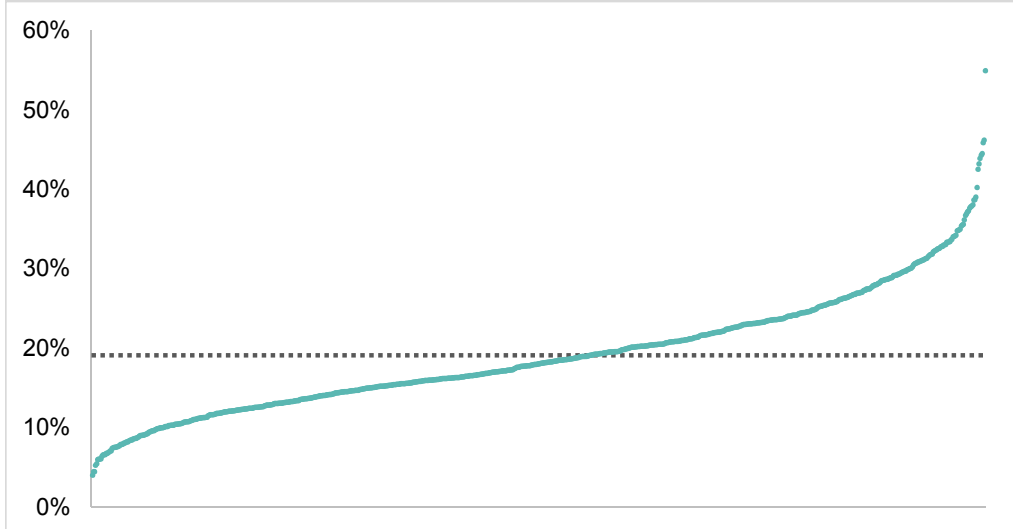

|    | Imaging for low back pain |
|----|---------------------------|
| 1  |                           |
| 2  |                           |
| 3  | 0.007785                  |
| 4  | 0.011161                  |
| 5  | 0.013183                  |
| 6  | 0.013857                  |
| 7  | 0.015584                  |
| 8  | 0.016688                  |
| 9  | 0.016807                  |
| 10 | 0.017192                  |
| 11 | 0.018767                  |
| 12 | 0.019943                  |
| 13 | 0.02104                   |
| 14 | 0.021401                  |
| 15 | 0.022321                  |
| 16 | 0.022422                  |
| 17 | 0.022472                  |
| 18 | 0.022936                  |
| 19 | 0.023419                  |
| 20 | 0.02381                   |
| 21 | 0.024055                  |
| 22 | 0.024209                  |
| 23 | 0.024283                  |
| 24 | 0.024413                  |
| 25 | 0.024735                  |
| 26 | 0.025243                  |
| 27 | 0.025295                  |
| 28 | 0.025723                  |
| 29 | 0.026423                  |
| 30 | 0.026432                  |
| 31 | 0.026549                  |
| 32 | 0.026786                  |
| 33 | 0.026906                  |
| 34 | 0.027027                  |
| 35 | 0.027057                  |
| 36 | 0.027344                  |
| 37 | 0.02762                   |
| 38 | 0.027636                  |
| 39 | 0.027778                  |
| 40 | 0.027933                  |
| 41 | 0.028                     |
| 42 | 0.02849                   |
| 43 | 0.028668                  |
| 44 | 0.028689                  |
| 45 | 0.028701                  |
| 46 | 0.028846                  |
| 47 | 0.028926                  |
| 48 | 0.028986                  |
| 49 | 0.029512                  |
| 50 | 0.029536                  |
| 51 | 0.029557                  |
| 52 | 0.02957                   |
| 53 | 0.030075                  |
| 54 | 0.030581                  |
| 55 | 0.030909                  |
| 56 | 0.031128                  |
| 57 |                           |
| 58 |                           |
| 59 |                           |
| 60 |                           |

N

Average SD  
436 0.068674 0.040178

Coefficient variation  
0.585062

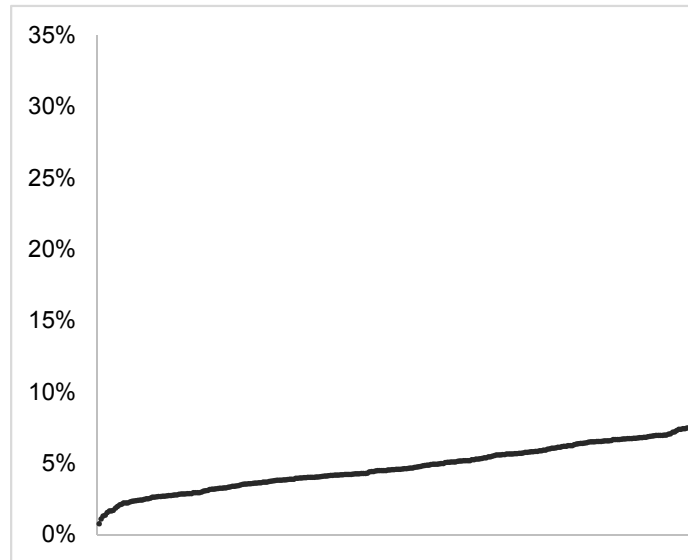

1  
2  
3  
4  
5  
6  
7  
8  
9  
10  
11  
12  
13  
14  
15  
16  
17  
18  
19  
20  
21  
22  
23  
24  
25  
26  
27  
28  
29  
30  
31  
32  
33  
34  
35  
36  
37  
38  
39  
40  
41  
42  
43  
44  
45  
46  
47  
48  
49

**Appendix 1: Codes used for cohort definitions and outcomes**

| Inclusion criteria                                                                                                                                                                                           | Exclusion criteria                                                                                                                                                                                                                                                                                                                                                                                                                                                                                                                                                                                                                                                                                                                                                                                                                                                                                                                                                                                                                                                                                                                                                                                                                                                                                                                                                                                                                                                                                                                                                                                                                                                                                                                                                                                                                                                                                                                                                                                                                                                                                                                                                                                                     | Outcomes                                                                                                                                                                             |
|--------------------------------------------------------------------------------------------------------------------------------------------------------------------------------------------------------------|------------------------------------------------------------------------------------------------------------------------------------------------------------------------------------------------------------------------------------------------------------------------------------------------------------------------------------------------------------------------------------------------------------------------------------------------------------------------------------------------------------------------------------------------------------------------------------------------------------------------------------------------------------------------------------------------------------------------------------------------------------------------------------------------------------------------------------------------------------------------------------------------------------------------------------------------------------------------------------------------------------------------------------------------------------------------------------------------------------------------------------------------------------------------------------------------------------------------------------------------------------------------------------------------------------------------------------------------------------------------------------------------------------------------------------------------------------------------------------------------------------------------------------------------------------------------------------------------------------------------------------------------------------------------------------------------------------------------------------------------------------------------------------------------------------------------------------------------------------------------------------------------------------------------------------------------------------------------------------------------------------------------------------------------------------------------------------------------------------------------------------------------------------------------------------------------------------------------|--------------------------------------------------------------------------------------------------------------------------------------------------------------------------------------|
| <i>Imaging for low back pain</i><br>OHIP claim for home or office visit to a primary care physician between April 1, 2008-March 31, 2013 with one of the following diagnostic codes as dxcode: 722, 724, 847 | Invalid IKN<br>Age <18 on visit date<br>Red flag history up to 5 years prior to back pain visit:<br>OHIP claims with dxcode for the following conditions:<br>Prior diagnoses of low back pain: 722, 724, 847<br>Neoplasms: 140-239<br>Conditions of the nervous system: 320-359<br>Arthritis: 714, 715, 716, 730<br>Congenital abnormalities: 741-759<br>Fractures: 805, 806, 829<br>OHIP claims with fee code for visits to the following specialists:<br>Neurosurgery: A043, A044, A045, A046, C042, C043, C044, C045, C046, C047, C048, C049; office visits to physician with specialty = "04" in IPDB<br>Orthopaedic surgery: A063, A064, A065, A066, C062, C063, C064, C065, C066, C067, C068, C069; office visits to physicians with specialty = "06" in IPDB<br>OHIP claims with fee code for a spine-related scan:<br>Spinal x-ray: X025, X027, X028, X031, X032, X033, X034, X202, X203, X204, X205, X206, X207; CT: X415, X416, X128; MRI: X490, X492, X493, X495, X496, X498; EMG: G455, G456, G457, G458, G459, G465, G466, G467, G469; Other tests on spine fee codes: X057, X058, X080, X081, X164, X173, J006, J011, J020, J030, J038, Z454, G368, G386<br>OHIP claims with fee code for a spine-related operation:<br>E533, E534, E535, E536, E548, E549, E554, E562, E565, E566, E567, E568, E570, E573, E574, E897, E901, E909, E910, E913, E914, E915, E920, E924, E926, E928, E929, F103, F105, F107, M137, N126, N182, N185, N186, N192, N194, N195, N196, N197, N248, N313, N314, N317, N318, N319, N320, N321, N323, N324, N329, N330, N331, N332, N333, N334, N335, N336, N337, N338, N339, N340, N341, R234, R251, R252, R254, R264, R270, R271, R274, R275, R296, R303, R310, R336, R346, R348, R350, R356, R357, R358, R359, R361, R362, R368, R369, R370, R371, R373, R374, R397, R419, R447, R450, R451, R452, R455, R457, R459, R461, R464, R493, R494, R634, R635, R636, S312, Z215, Z219, Z226, Z228, Z236, Z241, Z244, Z662, Z800, Z810, Z817, Z823, Z868<br>Hospital admission with one of the following diagnostic codes in CIHI-DAD:<br>ICD-9 324.1, 334.8, 334.9, 335, 336, 340, 342, 344, 349, 349.81, 350-359, 720-724, 737, 738.5, 739.3, 710-742, 805, 806, 839, 847, 950-957 | At least one OHIP claim with feecode for back imaging up to 3 months after index visit for low back pain:<br><br>CT: X415, X416, X128<br><br>MRI: X490, X492, X493, X495, X496, X498 |

| Inclusion criteria                                                                                                                                                                                                                                                                                                                                       | Exclusion criteria                                                                                                                                                                                                                                                                                                                                                                                                                                                                                                                                                                                                                             | Outcomes                                                                                                                                  |
|----------------------------------------------------------------------------------------------------------------------------------------------------------------------------------------------------------------------------------------------------------------------------------------------------------------------------------------------------------|------------------------------------------------------------------------------------------------------------------------------------------------------------------------------------------------------------------------------------------------------------------------------------------------------------------------------------------------------------------------------------------------------------------------------------------------------------------------------------------------------------------------------------------------------------------------------------------------------------------------------------------------|-------------------------------------------------------------------------------------------------------------------------------------------|
| <i>Cervical cancer screening</i>                                                                                                                                                                                                                                                                                                                         |                                                                                                                                                                                                                                                                                                                                                                                                                                                                                                                                                                                                                                                |                                                                                                                                           |
| Females aged <21 or >69 years of age between April 1, 2008-March 31, 2013                                                                                                                                                                                                                                                                                | Invalid IKN<br>Male sex<br>Age <13; age >105<br>Diagnosis of invasive gynaecological cancer prior to index date:<br>Entry in OCR with dxcode: 179, 1800, 1801, 1808, 1809, 1820, 1821, 1828, 1830, 1832, 1833, 1834, 1835, 1838, 1839<br>Evidence of hysterectomy prior to index date:<br>OHIP claim with feecode: S710, S727, S757, S758, S759, S762, S763, S765, S766, S767, S810, S816, P042<br>Entry in CIHI-DAD or SDS with CCP code: 79.2, 80.3, 80.4, 80.5, 80.6, 80.7, 86.42<br>Entry in CIHI-DAD or SDS with CCI code: 1RM89x, 1RM91x, 1RN89x, 5MD60CB, 5MD60KE, 5MD60KF, 5MD60RC, 5MD60RD<br>Entry in ICES HIV database<br>Pregnancy | At least one OHIP claim for cervical cancer screening with Pap smear:<br>Feecode: G365, G394, E430, E431<br>Lab feecode: L812, L713, L733 |
| <i>Repeat DEXA scans</i>                                                                                                                                                                                                                                                                                                                                 |                                                                                                                                                                                                                                                                                                                                                                                                                                                                                                                                                                                                                                                |                                                                                                                                           |
| OHIP claim for DEXA scan between April 1, 2008-March 31, 2013 with one of the following feecodes:<br>X145, X146, X152, X153, X142, X148, X149, X155                                                                                                                                                                                                      | Invalid IKN<br>Age <40 or age >105 on date of index scan                                                                                                                                                                                                                                                                                                                                                                                                                                                                                                                                                                                       | At least one OHIP claim for DEXA scan up to 2 years after date of index scan with feecode:<br>X152, X153, X142, X148, X149, X155          |
| OHIP = Ontario Health Insurance Plan; IKN = ICES Key Number; CIHI-DAD = Canadian Institute for Health Information Discharge Abstract Database; SDS = Same-day Surgery; CCP = Canadian Classification of Diagnostic, Therapeutic, and Surgical Procedures; CCI = Canadian Classification of Health Interventions; DEXA = dual energy X-ray absorptiometry |                                                                                                                                                                                                                                                                                                                                                                                                                                                                                                                                                                                                                                                |                                                                                                                                           |

Appendix to: Frequency and variation of Choosing Wisely recommendations in primary care: a retrospective, population-based cohort study  
 Ciara Pendrith, Meghan Bhatia, Noah M Ivers, Graham McCreedy, Karen Tu, Gillian A Hawker, Susan B Jaglal, Lynn Wilson, Kimberly Wintemute, Richard H Glazier, Wendy Levinson, R Sacha Bhatia

For Peer Review Only

**Appendix 4: Characteristics of cohort populations of interest (2012/13)**

| Characteristic, n (%)         | Imaging for low back pain | Cervical cancer screening | Repeat DEXA scans |
|-------------------------------|---------------------------|---------------------------|-------------------|
| N*                            | 51,929                    | 1,483,962                 | 394,314           |
| Age, mean (95% CI)**          | 41.8 (39.9-43.6)          | -                         | 63.9 (62.6-65.4)  |
| Age, grouped†                 |                           |                           |                   |
| <21 years                     | -                         | 729,901 (49.2)            | -                 |
| >69 years                     | -                         | 754,061 (50.8)            | -                 |
| Female                        | 22,650 (43.6)             | 1,483,962 (100.0)         | 332,198 (84.2)    |
| Neighbourhood income quintile |                           |                           |                   |
| 1 (lowest)                    | 10,537 (20.5)             | 299,740 (20.3)            | 64,455 (16.4)     |
| 2                             | 10,511 (20.4)             | 295,519 (20.0)            | 74,268 (18.9)     |
| 3                             | 10,452 (20.3)             | 289,017 (19.5)            | 77,134 (19.6)     |
| 4                             | 10,560 (20.5)             | 297,597 (20.1)            | 84,886 (21.6)     |
| 5 (highest)                   | 9,353 (18.2)              | 296,934 (20.1)            | 91,980 (23.4)     |
| Missing                       | 516                       | 5,155                     | 1,591             |
| Rurality                      |                           |                           |                   |
| Urban                         | 47,614 (92.3)             | 1,316,339 (88.7)          | 354,728 (90.1)    |
| Rural                         | 3,978 (7.7)               | 167,623 (11.3)            | 39,011 (9.9)      |
| Missing                       | 337                       | 0                         | 575               |
| Index DEXA scan risk level    |                           |                           |                   |
| Baseline scan                 | -                         | -                         | 75,446 (19.1)     |
| Low risk scan                 | -                         | -                         | 49,570 (12.6)     |
| High risk scan                | -                         | -                         | 269,298 (68.3)    |

\*N refers to the cohort denominator for the fiscal year 2012/13; \*\*mean age was not calculated for the cervical cancer screening population; †grouped age was only calculated for the cervical cancer screening population; DEXA = dual energy X-ray absorptiometry

Appendix to: Frequency and variation of Choosing Wisely recommendations in primary care: a retrospective, population-based cohort study

Ciara Pendrith, Meghan Bhatia, Noah M Ivers, Graham McCreedy, Karen Tu, Gillian A Hawker, Susan B Jaglal, Lynn Wilson, Kimberly Wintemute, Richard H Glazier, Wendy Levinson, R Sacha Bhatia

For Peer Review Only

**Appendix 3:** Regional variation in ordering of CW recommendations by Local Health Integration Network. CW = Choosing Wisely; DEXA = dual energy X-ray absorptiometry.

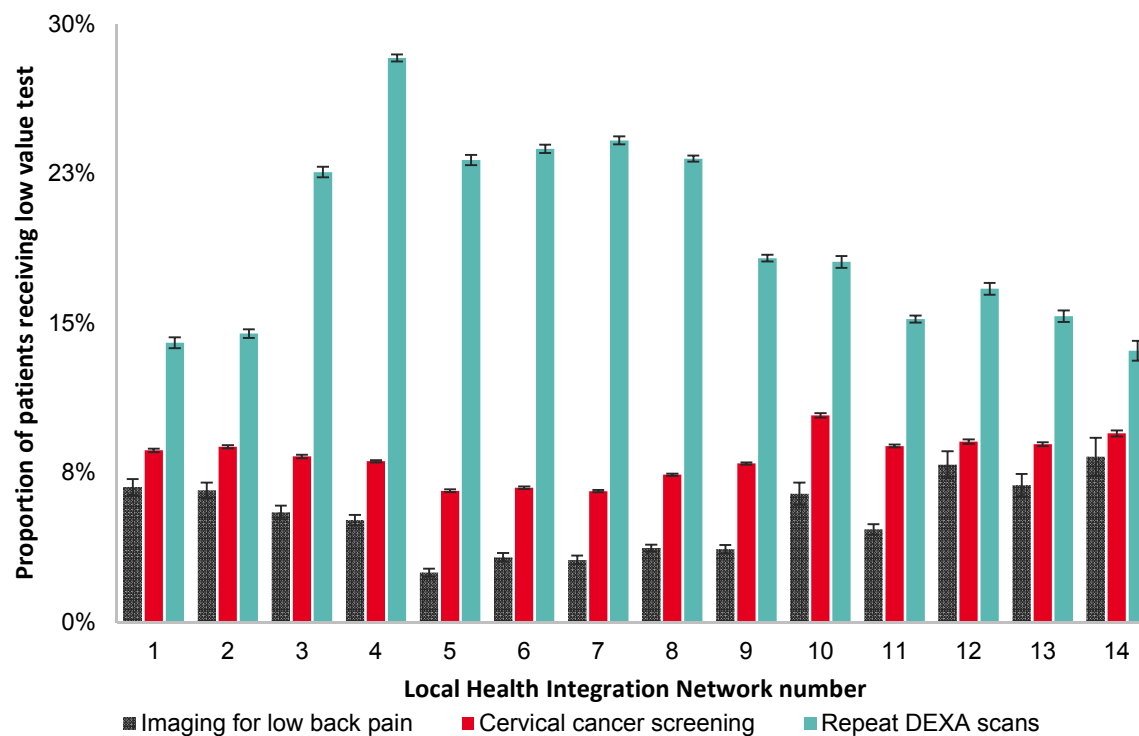

Supplement: supp_5.1.E45_2016-0095_original_submission.pdf [file supp_5.1.E45_2016-0095_original_submission.pdf]
