# Supplementary material
Source: PubMed Central journal article supplement (PMC5378544)
Supplement: supp_5.1.E45_2016-0095-2-at.pdf [file supp_5.1.E45_2016-0095-2-at.pdf]

**Appendix 2 (as supplied by the authors): Study cohort flow diagram**

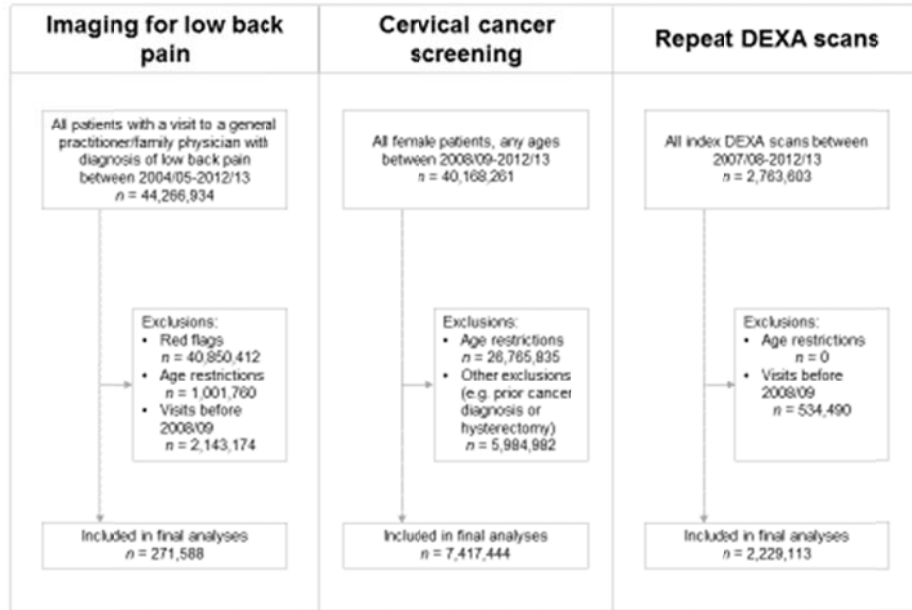

DEXA = dual energy x-ray absorptiometry
