# Supplementary material
Source: PubMed Central journal article supplement (PMC5378544)
Supplement: supp_5.1.E45_2016-0095-3-at.pdf [file supp_5.1.E45_2016-0095-3-at.pdf]

**Appendix 3 (as supplied by the authors) : Characteristics of cohort populations of interest (2012/13)**

| <b>Characteristic, n (%)</b>  | <b>Imaging for low back pain</b> | <b>Cervical cancer screening</b> | <b>Repeat DEXA scans</b> |
|-------------------------------|----------------------------------|----------------------------------|--------------------------|
| N*                            | 51,929                           | 1,483,962                        | 394,314                  |
| Age, mean (95% CI)**          | 41.8 (39.9-43.6)                 | -                                | 63.9 (62.6-65.4)         |
| Age, grouped†                 |                                  |                                  |                          |
| <21 years                     | -                                | 729,901 (49.2)                   | -                        |
| >69 years                     | -                                | 754,061 (50.8)                   | -                        |
| Female                        | 22,650 (43.6)                    | 1,483,962 (100.0)                | 332,198 (84.2)           |
| Neighbourhood income quintile |                                  |                                  |                          |
| 1 (lowest)                    | 10,537 (20.5)                    | 299,740 (20.3)                   | 64,455 (16.4)            |
| 2                             | 10,511 (20.4)                    | 295,519 (20.0)                   | 74,268 (18.9)            |
| 3                             | 10,452 (20.3)                    | 289,017 (19.5)                   | 77,134 (19.6)            |
| 4                             | 10,560 (20.5)                    | 297,597 (20.1)                   | 84,886 (21.6)            |
| 5 (highest)                   | 9,353 (18.2)                     | 296,934 (20.1)                   | 91,980 (23.4)            |
| Missing                       | 516                              | 5,155                            | 1,591                    |
| Rurality                      |                                  |                                  |                          |
| Urban                         | 47,614 (92.3)                    | 1,316,339 (88.7)                 | 354,728 (90.1)           |
| Rural                         | 3,978 (7.7)                      | 167,623 (11.3)                   | 39,011 (9.9)             |
| Missing                       | 337                              | 0                                | 575                      |
| Index DEXA scan risk level    |                                  |                                  |                          |
| Baseline scan                 | -                                | -                                | 75,446 (19.1)            |
| Low risk scan                 | -                                | -                                | 49,570 (12.6)            |
| High risk scan                | -                                | -                                | 269,298 (68.3)           |

\*N refers to the cohort denominator for the fiscal year 2012/13; \*\*mean age was not calculated for the cervical cancer screening population; †grouped age was only calculated for the cervical cancer screening population; DEXA = dual energy X-ray absorptiometry
